# Supplementary material for: Photocatalytic degradation and pathway of oxytetracycline in aqueous solution by Fe2O3–TiO2 nanopowder
Source: Royal Society of Chemistry journal article supplement (doi:10.1039/c5ra04540a), 2015-01-01
Supplement: c5ra04540a1.pdf [file c5ra04540a1.pdf]

## Supporting Information (SI)

For

# Photocatalytic Degradation and Pathway of Oxytetracycline in Aqueous Solution by Fe<sub>2</sub>O<sub>3</sub> - TiO<sub>2</sub> Nanopowders

Rong Li,<sup>a</sup> Yuefa Jia,<sup>a</sup> Jun Wu,<sup>a</sup> Qiang Zhen<sup>1a</sup>

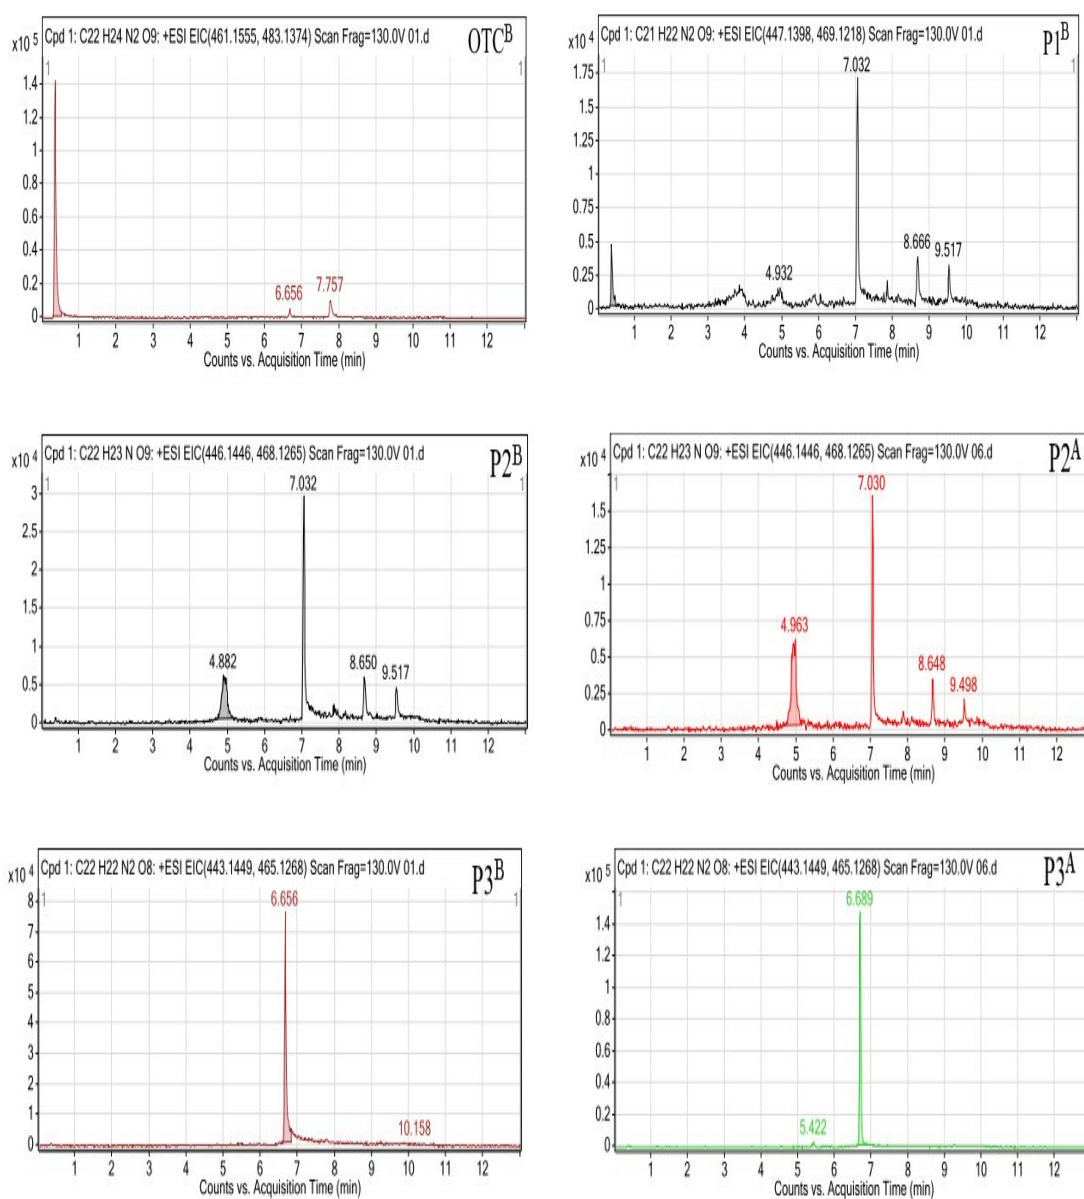

<sup>a</sup> Research Center of Nano Science and Technology, Shanghai University, Shanghai 200444, China. <sup>1</sup>E-mail address: [qzhen@staff.shu.edu.cn](mailto:qzhen@staff.shu.edu.cn)(Qiang ZHEN), Tel: +86 21 66137276.

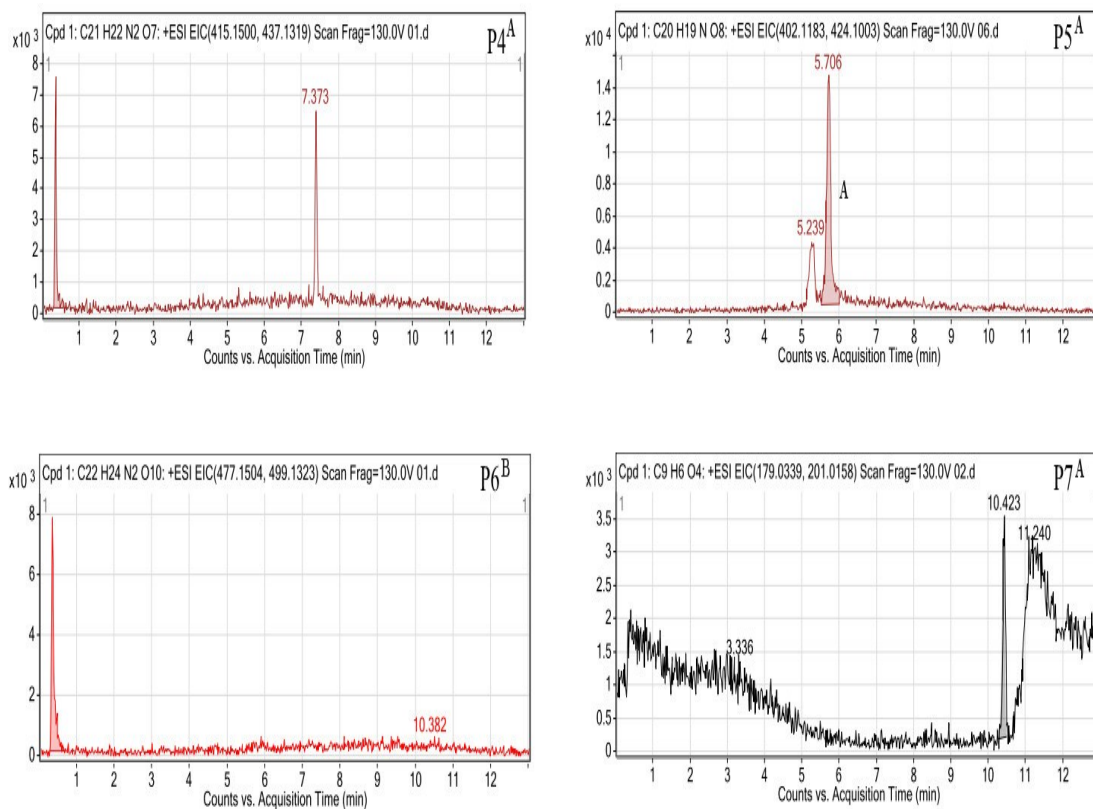

**Figure S1.** Iron spectra at different retention time (RT) of OTC photocatalysis sample before and after 5h ( $[45 \text{ Fe}_2\text{O}_3\text{-TiO}_2 \text{ NPs}] = 1\text{mg/mL}$ , OTC: 60 mg/L, pH=5.5, UV/vis experiment), using TOF-LC-MS. (superscript B: retention time detected in original OTC solution; superscript A: retention time detected in OTC solution after photocatalytic degradation).
